# Supplementary material for: Candidate Genes Identified by Constructing a Weighted Gene Co-Expression Network and Key Prognostic Factors of Pancreatic Adenocarcinoma
Source: Research Square preprint supplement (doi:10.21203/rs.3.rs-138900/v1), 2021-01-05
Supplement: Supplementary file 1 [file 752c16773aef3e566d350c6a.csv]

## Sheet: pheno
	pathologic_M	pathologic_N	disease_type	pathologic_T	alcoholic_exposure_category	followup_treatment_success	family_history_of_cancer	history_of_chronic_pancreatitis	history_of_diabetes	age_at_initial_pathologic_diagnosis	history_of_neoadjuvant_treatment	adenocarcinoma_invasion	gender.demographic	anatomic_neoplasm_subdivision_other	batch_number	day_of_form_completion	followup_case_report_form_submission_reason	histologic_grading_tier_category	histological_type_other	history_prior_surgery_type_other	init_pathology_dx_method_other	initial_pathologic_diagnosis_method	lost_follow_up	lymph_node_examined_count	maximum_tumor_dimension	month_of_dcc_upload	month_of_form_completion	neoplasm_histologic_grade	number_of_lymphnodes_positive_by_he	number_of_lymphnodes_positive_by_ihc	number_pack_years_smoked	other_dx	patient_death_reason	person_neoplasm_cancer_status	postoperative_rx_tx	primary_lymph_node_presentation_assessment	primary_therapy_outcome_success	radiation_therapy	stopped_smoking_year	surgery_performed_type	system_version	tissue_prospective_collection_indicator	tissue_retrospective_collection_indicator	tissue_source_site	tobacco_smoking_history	year_of_form_completion	year_of_initial_pathologic_diagnosis	year_of_tobacco_smoking_onset	dbgap_registration_code
TCGA-Z5-AAPL-01A	M0	N0	Ductal and Lobular Neoplasms	T3						74	No	YES	female	Body and Tail	424.46.0	24	Scheduled Follow-up Submission					Tumor resection	NO	9	NA	12	12	G1	0	NA	NA	No		TUMOR FREE	YES	YES	Complete Remission/Response	NO	NA		7th	YES	NO	Z5	1	2014	2013	NA	NA
TCGA-YY-A8LH-01A	MX	N1	Ductal and Lobular Neoplasms	T3	Occasional Drinker	Complete Remission/Response	YES	NO	NO	61	No	YES	female		369.54.0	29	Scheduled Follow-up Submission			Distal Pancreatectomy & laporoscopy followed by Hand-assisted and Splenectomy		Tumor resection	NO	17	4.2	12	10	G3	2	NA	46	No		TUMOR FREE	YES	YES	Complete Remission/Response	YES	NA	Other Method (please specify)	6th	NO	YES	YY	2	2014	2009	1963	178
TCGA-YH-A8SY-01A	MX	N1	Adenomas and Adenocarcinomas	T3	Weekly Drinker		NO	NO	NO	73	No	YES	female		390.52.0	NA		Three Tier				Cytology (e.g. Peritoneal or pleural fluid)		27	4.1	12	NA	G2	16	NA	NA	No				YES			NA	Whipple	7th	NO	YES	YH	1	NA	2011	NA	NA
TCGA-YB-A89D-11A	MX	N1	Ductal and Lobular Neoplasms	T3			YES	NO	YES	59	No	YES	male		369.54.0	11	Scheduled Follow-up Submission	Four Tier				Tumor resection	NO	17	3.2	12	11	G2	4	NA	NA	No		TUMOR FREE	YES	YES	Complete Remission/Response	YES	NA	Whipple	7th	YES	NO	YB	1	2014	2013	NA	178
TCGA-YB-A89D-01A	MX	N1	Ductal and Lobular Neoplasms	T3			YES	NO	YES	59	No	YES	male		369.54.0	11	Scheduled Follow-up Submission	Four Tier				Tumor resection	NO	17	3.2	12	11	G2	4	NA	NA	No		TUMOR FREE	YES	YES	Complete Remission/Response	YES	NA	Whipple	7th	YES	NO	YB	1	2014	2013	NA	178
TCGA-XN-A8T5-01A	M0	N0	Ductal and Lobular Neoplasms	T2		Progressive Disease		NO	YES	53	No	YES	female		369.54.0	9	Scheduled Follow-up Submission	Four Tier	moderately differentiated ductal adenocarcinoma 60% + neuroendocrine 40%			Tumor resection	NO	6	2.5	12	2	G2	0	0	15.2	No		WITH TUMOR	YES	YES	Progressive Disease	YES	NA	Whipple	7th	NO	YES	XN	2	2015	2012	1974	178
TCGA-XN-A8T3-01A	M0	N0	Ductal and Lobular Neoplasms	T2		Partial Remission/Response		NO	NO	67	No	YES	male		369.54.0	9	Scheduled Follow-up Submission	Four Tier				Tumor resection	NO	15	2.4	12	2	G2	0	0	NA	No		WITH TUMOR	YES	YES	Progressive Disease	YES	1981	Whipple	7th	NO	YES	XN	5	2015	2012	NA	178
TCGA-XD-AAUL-01A	MX	N0	Ductal and Lobular Neoplasms	T3	None		NO	YES	NO	56	No	YES	male		410.47.0	29	Scheduled Follow-up Submission				endoscopic ultrasound-guided fine needle aspiration	Other method, specify:	NO	21	2	12	12	G2	0	NA	30	Yes, History of Prior Malignancy		TUMOR FREE	YES	YES	Complete Remission/Response	NO	NA	Whipple	7th	YES	NO	XD	2	2014	2013	1984	NA
TCGA-XD-AAUI-01A	MX	N1	Ductal and Lobular Neoplasms	T3	Occasional Drinker	Progressive Disease	NO		YES	50	No	YES	female		424.46.0	29	Scheduled Follow-up Submission					Tissue Biopsy	NO	33	3.5	12	12	G2	10	NA	NA	No	Pancreatic Cancer	WITH TUMOR	YES	YES	Progressive Disease	NO	NA	Whipple	7th	YES	NO	XD	2	2014	2013	1979	NA
TCGA-XD-AAUH-11A	M0	N1	Ductal and Lobular Neoplasms	T3	Daily Drinker		YES	NO	NO	57	No	YES	female		424.46.0	6	Scheduled Follow-up Submission					Tumor resection	NO	30	2.8	12	1	G2	7	NA	NA	No			YES	YES		YES	NA	Whipple	7th	YES	NO	XD	1	2015	2013	NA	NA
TCGA-XD-AAUH-01A	M0	N1	Ductal and Lobular Neoplasms	T3	Daily Drinker		YES	NO	NO	57	No	YES	female		424.46.0	6	Scheduled Follow-up Submission					Tumor resection	NO	30	2.8	12	1	G2	7	NA	NA	No			YES	YES		YES	NA	Whipple	7th	YES	NO	XD	1	2015	2013	NA	NA
TCGA-XD-AAUG-01A	M1	N1	Ductal and Lobular Neoplasms	T3	Weekly Drinker		YES			66	No	NO	female	distal pancreas	424.46.0	29	Scheduled Follow-up Submission			Near total pancreatomy with splenectomy, duodenum perserving		Tumor resection	NO	12	3.2	12	12	G2	1	0	NA	No		TUMOR FREE	YES	YES		NO	NA	Other Method (please specify)	7th	YES	NO	XD	1	2014	2013	NA	NA
TCGA-US-A77J-11A	MX	N1b	Ductal and Lobular Neoplasms	T3	Daily Drinker		YES	NO	NO	81	No	YES	female		330.58.0	NA		Four Tier				Tumor resection		20	2.5	12	NA	G2	4	0	NA	No				YES			NA	Whipple	7th	NO	YES	US	1	NA	2010	NA	NA
TCGA-US-A77J-01A	MX	N1b	Ductal and Lobular Neoplasms	T3	Daily Drinker		YES	NO	NO	81	No	YES	female		330.58.0	NA		Four Tier				Tumor resection		20	2.5	12	NA	G2	4	0	NA	No				YES			NA	Whipple	7th	NO	YES	US	1	NA	2010	NA	NA
TCGA-US-A77G-11A	MX	N1	Ductal and Lobular Neoplasms	T3	Daily Drinker			NO	NO	64	No	YES	male		330.58.0	NA		Four Tier				Tumor resection		11	2	12	NA	G2	3	0	NA	No				YES			NA	Whipple	7th	NO	YES	US	1	NA	2010	NA	178
TCGA-US-A77G-01A	MX	N1	Ductal and Lobular Neoplasms	T3	Daily Drinker			NO	NO	64	No	YES	male		330.58.0	NA		Four Tier				Tumor resection		11	2	12	NA	G2	3	0	NA	No				YES			NA	Whipple	7th	NO	YES	US	1	NA	2010	NA	178
TCGA-US-A77E-11A	MX	N1	Adenomas and Adenocarcinomas	T3	Daily Drinker		YES	NO	NO	73	No	YES	male		330.58.0	NA		Four Tier	Adenocarcinoma- NOS					13	3.5	12	NA	G3	2	0	NA	Yes, History of Prior Malignancy				YES			1987	Whipple	7th	NO	YES	US	3	NA	2012	NA	178
TCGA-US-A77E-01A	MX	N1	Adenomas and Adenocarcinomas	T3	Daily Drinker		YES	NO	NO	73	No	YES	male		330.58.0	NA		Four Tier	Adenocarcinoma- NOS					13	3.5	12	NA	G3	2	0	NA	Yes, History of Prior Malignancy				YES			1987	Whipple	7th	NO	YES	US	3	NA	2012	NA	178
TCGA-US-A779-11A	MX	N1b	Ductal and Lobular Neoplasms	T3	Occasional Drinker		NO	NO	NO	54	No	YES	female		330.58.0	NA		Four Tier				Tumor resection		21	3	12	NA	G1	2	0	NA	No				YES			NA	Whipple	7th	NO	YES	US	1	NA	2011	NA	NA
TCGA-US-A779-01A	MX	N1b	Ductal and Lobular Neoplasms	T3	Occasional Drinker		NO	NO	NO	54	No	YES	female		330.58.0	NA		Four Tier				Tumor resection		21	3	12	NA	G1	2	0	NA	No				YES			NA	Whipple	7th	NO	YES	US	1	NA	2011	NA	NA
TCGA-US-A776-11A	MX	N0	Cystic, Mucinous and Serous Neoplasms	T3	None		NO	NO	YES	61	No	YES	male		349.58.0	6	Scheduled Follow-up Submission	Four Tier				Tumor resection	NO	14	3	12	1	G2	0	0	NA	No		TUMOR FREE	NO	YES	Complete Remission/Response	NO	NA	Whipple	7th	NO	YES	US	1	2014	2011	NA	178
TCGA-US-A776-01A	MX	N0	Cystic, Mucinous and Serous Neoplasms	T3	None		NO	NO	YES	61	No	YES	male		349.58.0	6	Scheduled Follow-up Submission	Four Tier				Tumor resection	NO	14	3	12	1	G2	0	0	NA	No		TUMOR FREE	NO	YES	Complete Remission/Response	NO	NA	Whipple	7th	NO	YES	US	1	2014	2011	NA	178
TCGA-US-A774-11A	MX	N1	Ductal and Lobular Neoplasms	T3	Social Drinker		YES	NO	NO	76	No	YES	female		330.58.0	NA		Four Tier				Tumor resection		17	4	12	NA	G3	2	0	4.65	No				YES			1992	Whipple	7th	NO	YES	US	3	NA	2011	1955	178
TCGA-US-A774-01A	MX	N1	Ductal and Lobular Neoplasms	T3	Social Drinker		YES	NO	NO	76	No	YES	female		330.58.0	NA		Four Tier				Tumor resection		17	4	12	NA	G3	2	0	4.65	No				YES			1992	Whipple	7th	NO	YES	US	3	NA	2011	1955	178
TCGA-S4-A8RP-01A	MX	N1	Ductal and Lobular Neoplasms	T3	Social Drinker		YES	NO	NO	77	No	YES	female		369.54.0	NA		Three Tier				Tumor resection		10	2.8	12	NA	G3	2	0	26	No				YES			1982	Whipple	7th	NO	YES	S4	3	NA	2010	NA	178
TCGA-S4-A8RO-01A	MX	N1	Ductal and Lobular Neoplasms	T3	Weekly Drinker		NO	NO	NO	75	No	YES	female		390.52.0	3	Scheduled Follow-up Submission	Three Tier				Tumor resection	NO	17	4	12	11	G2	1	0	NA	Yes, History of Prior Malignancy		WITH TUMOR	YES	YES	Complete Remission/Response	YES	NA	Whipple	7th	YES	NO	S4	1	2014	2013	NA	NA
TCGA-S4-A8RM-01A	MX	N1	Ductal and Lobular Neoplasms	T3	Weekly Drinker	Complete Remission/Response	YES	NO	YES	67	No	YES	male	overlapping parts of pancreas	390.52.0	31	Scheduled Follow-up Submission	Three Tier				Tumor resection	NO	9	6	12	10	G3	1	0	25	No		TUMOR FREE	YES	YES	Complete Remission/Response	NO	1991	Total Pancreatectomy	7th	YES	NO	S4	3	2014	2013	1966	NA
TCGA-RL-AAAS-01A	M0	N0	Ductal and Lobular Neoplasms	T2		Complete Remission/Response	NO	NO	YES	60	No	YES	female		410.47.0	19	Scheduled Follow-up Submission					Tumor resection	NO	20	2	12	8	G2	0	0	NA	No		TUMOR FREE	NO	YES	Complete Remission/Response	NO	NA	Whipple	7th	NO	YES	RL	2	2014	2013	NA	NA
TCGA-RB-AA9M-01A	MX	N1	Ductal and Lobular Neoplasms	T1	None	Progressive Disease	YES	NO	NO	43	No	YES	male		410.47.0	29	Scheduled Follow-up Submission	Four Tier				Tissue Biopsy	NO	9	2	12	10	G3	1	NA	NA	No		WITH TUMOR	YES	YES	Progressive Disease	YES	NA	Distal Pancreatectomy	7th	YES	NO	RB	1	2014	2013	NA	NA
TCGA-RB-A7B8-01A	MX	N1	Adenomas and Adenocarcinomas	T3	None	Progressive Disease	YES	NO	NO	81	No	YES	female		349.58.0	29	Scheduled Follow-up Submission	Four Tier	ductal and micropapillary			Tumor resection	NO	24	2.3	12	10	G2	8	0	NA	No	Pancreatic Cancer		YES	YES	Complete Remission/Response	NO	NA	Whipple	7th	YES	NO	RB	1	2014	2013	NA	178
TCGA-Q3-AA2A-01A	MX	N1	Ductal and Lobular Neoplasms	T3	None				NO	64	No	YES	female		390.52.0	22	Scheduled Follow-up Submission	Three Tier				Tumor resection	NO	26	NA	12	7	G1	9	0	NA	No		TUMOR FREE	NO	YES		NO	NA	Whipple	7th	YES	NO	Q3	1	2014	2013	NA	NA
TCGA-Q3-A5QY-01A	MX	N1	Ductal and Lobular Neoplasms	T3			NO	NO	YES	58	No	YES	male		330.58.0	25	Scheduled Follow-up Submission	Four Tier				Tumor resection	NO	18	2.7	12	2	G2	4	0	NA	No				YES		NO	NA	Whipple	7th	YES	NO	Q3	1	2014	2012	NA	NA
TCGA-PZ-A5RE-11A	MX	N1	Ductal and Lobular Neoplasms	T3		Progressive Disease				44	No	YES	female		330.58.0	25	Scheduled Follow-up Submission	Four Tier				Tumor resection	NO	22	3	12	8	G3	3	NA	NA	No	Pancreatic Cancer	WITH TUMOR	YES	YES		YES	NA	Whipple	7th	YES	NO	PZ	3	2014	2012	NA	178
TCGA-PZ-A5RE-01A	MX	N1	Ductal and Lobular Neoplasms	T3		Progressive Disease				44	No	YES	female		330.58.0	25	Scheduled Follow-up Submission	Four Tier				Tumor resection	NO	22	3	12	8	G3	3	NA	NA	No	Pancreatic Cancer	WITH TUMOR	YES	YES		YES	NA	Whipple	7th	YES	NO	PZ	3	2014	2012	NA	178
TCGA-OE-A75W-01A	M0	N0	Ductal and Lobular Neoplasms	T3	Daily Drinker	Progressive Disease	YES	YES	YES	75	No	YES	male		330.58.0	16	Scheduled Follow-up Submission	Four Tier				Cytology (e.g. Peritoneal or pleural fluid)	NO	22	4.5	12	10	G1	0	0	30	No			YES	YES	Progressive Disease	YES	1976	Distal Pancreatectomy	7th	YES	NO	OE	3	2014	2013	1956	178
TCGA-M8-A5N4-01A	M0	N0	Ductal and Lobular Neoplasms	T3	Social Drinker			NO	NO	48	No	YES	female		284.63.0	NA		Four Tier				Cytology (e.g. Peritoneal or pleural fluid)		1	3.4	12	NA	G2	0	NA	NA	No				YES			NA	Whipple	6th	NO	YES	M8	1	NA	NA	NA	178
TCGA-LB-A9Q5-01A	MX	N1	Ductal and Lobular Neoplasms	T3	None	Progressive Disease	YES	NO	NO	63	No	YES	female		410.47.0	31	Scheduled Follow-up Submission	Three Tier				Tumor resection	NO	12	3	12	10	G3	3	NA	0.3	No	Pancreatic Cancer	WITH TUMOR	YES	YES		YES	1973	Whipple	7th	YES	NO	LB	3	2014	2013	1971	NA
TCGA-LB-A8F3-01A	MX	N0	Ductal and Lobular Neoplasms	T3	None		YES		NO	64	No	YES	female		369.54.0	16	Scheduled Follow-up Submission	Four Tier				Tumor resection	NO	10	5	12	9	G1	0	NA	NA	No		TUMOR FREE	YES	YES		YES	NA	Whipple	7th	YES	NO	LB	1	2014	2013	NA	178
TCGA-LB-A7SX-01A	MX	N1	Ductal and Lobular Neoplasms	T3	Daily Drinker		YES	YES	NO	74	No	YES	female		349.58.0	20	Scheduled Follow-up Submission					Tumor resection	NO	26	2.5	12	10	G2	7	0	40	Yes, History of Prior Malignancy	Other, non-malignant disease		YES	YES	Stable Disease	NO	NA	Whipple	7th	YES	NO	LB	2	2014	2013	1952	178
TCGA-L1-A7W4-11A	M0	N1	Ductal and Lobular Neoplasms	T3	None	Progressive Disease	NO	NO	NO	48	No	YES	female		369.54.0	30	Scheduled Follow-up Submission	Three Tier				Tissue Biopsy	NO	11	2.8	12	12	G3	2	NA	NA	No	Pancreatic Cancer	WITH TUMOR	YES	YES	Progressive Disease	NO	NA	Whipple	7th	YES	NO	L1	1	2014	2013	NA	178
TCGA-L1-A7W4-01A	M0	N1	Ductal and Lobular Neoplasms	T3	None	Progressive Disease	NO	NO	NO	48	No	YES	female		369.54.0	30	Scheduled Follow-up Submission	Three Tier				Tissue Biopsy	NO	11	2.8	12	12	G3	2	NA	NA	No	Pancreatic Cancer	WITH TUMOR	YES	YES	Progressive Disease	NO	NA	Whipple	7th	YES	NO	L1	1	2014	2013	NA	178
TCGA-IB-AAUW-01A	M0	N1	Ductal and Lobular Neoplasms	T3	Occasional Drinker	Progressive Disease	YES	NO	YES	63	No	YES	female		392.50.0	3	Scheduled Follow-up Submission					Tumor resection	NO	9	3.5	12	11	G3	1	NA	NA	No		WITH TUMOR	YES	YES	Complete Remission/Response	NO	NA	Whipple	7th	YES	NO	IB	1	2014	2013	NA	NA
TCGA-IB-AAUV-01A	M0	N1	Ductal and Lobular Neoplasms	T3	None	Complete Remission/Response	NO	NO	NO	49	No	YES	male		392.50.0	30	Scheduled Follow-up Submission					Cytology (e.g. Peritoneal or pleural fluid)	NO	15	4.8	12	9	G2	3	NA	50	No			YES	YES	Complete Remission/Response	NO	NA	Whipple	7th	YES	NO	IB	2	2014	2013	1980	NA
TCGA-IB-AAUU-01A	M0	N1	Ductal and Lobular Neoplasms	T3	None	Complete Remission/Response	YES	NO	NO	35	No	YES	male		390.52.0	30	Scheduled Follow-up Submission					Tumor resection	NO	16	3	12	9	G3	2	NA	15	No		TUMOR FREE	YES	YES	Complete Remission/Response	NO	2013	Whipple	7th	YES	NO	IB	4	2014	2013	NA	178
TCGA-IB-AAUT-01A	M0	N1	Cystic, Mucinous and Serous Neoplasms	T2	None	Complete Remission/Response	YES	NO	YES	65	No	YES	male		390.52.0	30	Scheduled Follow-up Submission					Tumor resection	NO	11	NA	12	9	G1	7	NA	15	No		TUMOR FREE	YES	YES	Complete Remission/Response	NO	2003	Whipple	7th	YES	NO	IB	4	2014	2013	1988	178
TCGA-IB-AAUS-01A	M0	N1	Ductal and Lobular Neoplasms	T3	Daily Drinker		YES	NO	YES	84	No	YES	female	Pancreas Head and Body	392.50.0	30	Scheduled Follow-up Submission					Tumor resection	NO	14	4	12	9	G2	2	NA	40	No		WITH TUMOR	YES	YES		NO	2013	Whipple	7th	YES	NO	IB	4	2014	2013	1948	NA
TCGA-IB-AAUR-01A	M0	N1	Ductal and Lobular Neoplasms	T3	None	Progressive Disease		NO	YES	67	No	YES	male		392.50.0	30	Scheduled Follow-up Submission					Tumor resection	NO	21	3.7	12	9	G1	9	NA	NA	No		WITH TUMOR	NO	YES	Partial Remission/Response	NO	1989	Whipple	7th	YES	NO	IB	3	2014	2013	NA	NA
TCGA-IB-AAUQ-01A	M0	N1	Ductal and Lobular Neoplasms	T3	Social Drinker	Progressive Disease	YES	NO	NO	50	No	YES	male		424.46.0	8	Additional New Tumor Event					Tumor resection	NO	21	4.5	12	7	G2	13	NA	69	No	Pancreatic Cancer	WITH TUMOR	NO	YES	Partial Remission/Response	NO	2001	Distal Pancreatectomy	7th	YES	NO	IB	4	2014	2013	1978	NA
TCGA-IB-AAUP-01A	M0	N1	Ductal and Lobular Neoplasms	T3	None	Complete Remission/Response	YES	NO	YES	68	No	YES	male		390.52.0	30	Scheduled Follow-up Submission			Endoscopic Retrograde Cholangiopancreaticography		Cytology (e.g. Peritoneal or pleural fluid)	NO	21	2.7	12	9	G2	7	NA	NA	No		TUMOR FREE	YES	YES	Complete Remission/Response	NO	1984	Other Method (please specify)	7th	YES	NO	IB	3	2014	2013	NA	NA
TCGA-IB-AAUO-01A	M0	N1	Ductal and Lobular Neoplasms	T3	Social Drinker	Progressive Disease	NO	NO	NO	64	No	YES	female		392.50.0	8	Additional New Tumor Event					Tumor resection	NO	5	2.7	12	7	G3	5	NA	NA	No		WITH TUMOR	NO	YES	Partial Remission/Response	NO	NA	Whipple	7th	YES	NO	IB	1	2014	2013	NA	NA
TCGA-IB-AAUN-01A	M0	N0	Ductal and Lobular Neoplasms	T2	None		YES	NO	NO	74	No	YES	female		392.50.0	30	Scheduled Follow-up Submission					Tumor resection	NO	15	2.3	12	9	G2	0	NA	NA	No			NO	YES	Complete Remission/Response	NO	NA	Whipple	7th	YES	NO	IB	1	2014	2013	NA	NA
TCGA-IB-AAUM-01A	M0	N1	Ductal and Lobular Neoplasms	T2	None			NO	YES	76	No	YES	male		390.52.0	3	Scheduled Follow-up Submission	Three Tier				Tumor resection	NO	1	2.1	12	11	G3	1	NA	NA	No		WITH TUMOR	NO	YES	Partial Remission/Response	NO	NA	Whipple	7th	YES	NO	IB	1	2014	2013	NA	NA
TCGA-IB-A7M4-01A	MX	N1	Ductal and Lobular Neoplasms	T3	Daily Drinker	Complete Remission/Response	YES	NO	NO	81	No	YES	male		369.54.0	30	Scheduled Follow-up Submission					Tumor resection	NO	16	NA	12	9	G3	1	NA	52	No		TUMOR FREE	NO	YES	Complete Remission/Response	NO	2008	Distal Pancreatectomy	7th	YES	NO	IB	4	2014	2013	1956	NA
TCGA-IB-A7LX-01A	MX	N1	Ductal and Lobular Neoplasms	T3	Occasional Drinker	Progressive Disease		NO	NO	57	No	YES	male		369.54.0	4	Additional New Tumor Event					Tumor resection	NO	6	5.5	12	2	G2	4	NA	NA	No	Pancreatic Cancer	WITH TUMOR	NO	YES		NO	NA	Whipple	7th	YES	NO	IB	4	2014	2012	NA	178
TCGA-IB-A6UG-01A	M0	N1	Ductal and Lobular Neoplasms	T3	None			NO	NO	65	No	YES	male		349.58.0	4	Scheduled Follow-up Submission	Four Tier				Tissue Biopsy	NO	19	3	12	9	G3	16	NA	33.75	No	Other, non-malignant disease	WITH TUMOR	NO	YES	Partial Remission/Response	NO	NA	Whipple	7th	YES	NO	IB	2	2014	2012	1968	NA
TCGA-IB-A6UF-01A	M0	N1	Ductal and Lobular Neoplasms	T3	Daily Drinker			NO	YES	63	No	YES	male		349.58.0	4	Scheduled Follow-up Submission	Four Tier				Tissue Biopsy	NO	18	3.3	12	9	G2	7	NA	40	No		WITH TUMOR	YES	YES	Partial Remission/Response	NO	NA	Whipple	7th	YES	NO	IB	2	2014	2012	1973	NA
TCGA-IB-A5ST-01A	M0	N1	Ductal and Lobular Neoplasms	T3		Complete Remission/Response	YES	NO	NO	64	No	YES	female		330.58.0	23	Scheduled Follow-up Submission					Tumor resection	NO	16	3.2	12	7	G2	2	NA	NA	No		TUMOR FREE	NO	YES	Complete Remission/Response	NO	NA	Whipple	7th	YES	NO	IB	1	2014	2012	NA	178
TCGA-IB-A5SS-01A	M0	N1	Ductal and Lobular Neoplasms	T3				NO	YES	64	No	YES	female		330.58.0	23	Scheduled Follow-up Submission					Tumor resection	NO	7	4.5	12	7	G3	5	NA	20	Yes, History of Prior Malignancy	Pancreatic Cancer	WITH TUMOR	YES	YES	Complete Remission/Response	NO	NA	Distal Pancreatectomy	7th	NO	YES	IB	2	2014	2011	1991	NA
TCGA-IB-A5SQ-01A	M0	N0	Ductal and Lobular Neoplasms	T2	Occasional Drinker		YES	NO	NO	56	No	YES	female		330.58.0	NA						Tumor resection		9	2.5	12	NA	G2	0	NA	NA	No				YES			NA	Whipple	7th	NO	YES	IB	1	NA	2012	NA	NA
TCGA-IB-A5SP-01A	M0	N0	Ductal and Lobular Neoplasms	T3	None		YES	NO	NO	77	No	YES	male		330.58.0	12	Scheduled Follow-up Submission					Cytology (e.g. Peritoneal or pleural fluid)	NO	14	3	12	11	G2	0	NA	NA	No		WITH TUMOR	YES	YES		NO	NA	Whipple	7th	NO	YES	IB	1	2014	2011	NA	178
TCGA-IB-A5SO-01A	M0	N1	Ductal and Lobular Neoplasms	T3		Progressive Disease	NO	NO	NO	71	No	YES	male		330.58.0	23	Scheduled Follow-up Submission					Tumor resection	NO	12	3.8	12	7	G2	3	NA	NA	No	Pancreatic Cancer	WITH TUMOR	NO	YES	Progressive Disease	NO	NA	Whipple	7th	NO	YES	IB	1	2014	2012	NA	NA
TCGA-IB-8127-01A	M0	N1	Ductal and Lobular Neoplasms	T3		Progressive Disease	NO	NO	NO	59	No	YES	male		247.64.0	8	Scheduled Follow-up Submission					Tumor resection	NO	24	4.5	12	5	G2	3	NA	40	No		WITH TUMOR	YES	YES	Complete Remission/Response	NO	2011	Whipple	7th	NO	YES	IB	4	2013	2011	1971	178
TCGA-IB-8126-01A	M0	N1	Ductal and Lobular Neoplasms	T4	None		YES	NO	YES	79	No	YES	female		247.64.0	2	Scheduled Follow-up Submission					Tumor resection	YES	10	3.5	12	7	G1	5	NA	4	No				YES			1961	Whipple	7th	NO	YES	IB	3	2013	2011	1957	178
TCGA-IB-7897-01A	M0	N1	Ductal and Lobular Neoplasms	T3	Social Drinker		YES	NO	NO	53	No	YES	female		210.65.0	3	Scheduled Follow-up Submission					Tumor resection	NO	17	3.5	12	7	G2	2	NA	NA	No	Pancreatic Cancer	WITH TUMOR	NO	YES	Progressive Disease	NO	1981	Whipple	6th	NO	YES	IB	5	2013	2008	NA	178
TCGA-IB-7893-01A	M0	N0	Ductal and Lobular Neoplasms	T3	Social Drinker		YES	NO	YES	64	No	YES	male		210.65.0	3	Scheduled Follow-up Submission					Tumor resection	NO	8	7	12	7	G3	0	NA	NA	No	Pancreatic Cancer	WITH TUMOR	NO	YES		NO	1979	Distal Pancreatectomy	6th	NO	YES	IB	3	2013	2009	NA	178
TCGA-IB-7891-01A	M0	N1	Ductal and Lobular Neoplasms	T3	Social Drinker	Stable Disease	YES	NO	NO	49	No	YES	female		210.65.0	9	Scheduled Follow-up Submission					Cytology (e.g. Peritoneal or pleural fluid)	NO	11	2.3	12	5	G1	7	NA	29	No		WITH TUMOR	YES	YES		NO	2009	Whipple	7th	NO	YES	IB	4	2013	2011	1980	178
TCGA-IB-7890-01A	M0	N0	Ductal and Lobular Neoplasms	T2	Occasional Drinker			NO	NO	73	No	YES	male		210.65.0	3	Scheduled Follow-up Submission					Tumor resection	NO	11	2.8	12	7	G3	0	NA	NA	No	Pancreatic Cancer	WITH TUMOR	NO	YES		NO	NA	Distal Pancreatectomy	6th	NO	YES	IB	1	2013	2008	NA	NA
TCGA-IB-7889-01A	M0	N1	Ductal and Lobular Neoplasms	T3			YES	NO	NO	85	No	YES	female		195.65.0	3	Scheduled Follow-up Submission					Cytology (e.g. Peritoneal or pleural fluid)	NO	13	2.5	12	7	G1	3	NA	NA	No	Pancreatic Cancer	WITH TUMOR	YES	YES	Progressive Disease	NO	NA	Whipple	7th	NO	YES	IB	1	2013	2011	NA	NA
TCGA-IB-7888-01A	M0	N0	Ductal and Lobular Neoplasms	T3				NO	NO	66	No	YES	female		195.65.0	9	Scheduled Follow-up Submission					Cytology (e.g. Peritoneal or pleural fluid)	NO	12	3	12	5	G2	0	NA	NA	No	Pancreatic Cancer	WITH TUMOR	YES	YES	Stable Disease	NO	NA	Whipple	6th	NO	YES	IB	NA	2013	2008	NA	178
TCGA-IB-7887-01A	M0	N1	Ductal and Lobular Neoplasms	T3			YES	NO	NO	62	No	YES	female		195.65.0	8	Scheduled Follow-up Submission					Tumor resection	NO	8	5.5	12	5	G2	3	NA	20	No	Pancreatic Cancer		NO	YES		NO	NA	Whipple	7th	NO	YES	IB	2	2013	2009	NA	178
TCGA-IB-7886-01A	M0	N1	Ductal and Lobular Neoplasms	T3	Daily Drinker		NO	NO	NO	80	No	YES	male		195.65.0	3	Scheduled Follow-up Submission					Tumor resection	NO	11	6	12	7	G3	4	NA	35	No	Other, non-malignant disease	TUMOR FREE	NO	YES		NO	NA	Whipple	7th	NO	YES	IB	2	2013	2010	1975	178
TCGA-IB-7885-01A	M0	N1	Ductal and Lobular Neoplasms	T3	None		YES	NO	NO	78	No	YES	female		195.65.0	3	Scheduled Follow-up Submission					Tumor resection	NO	12	2.4	12	7	G2	3	NA	20	No		TUMOR FREE	YES	YES	Complete Remission/Response	NO	1980	Whipple	7th	NO	YES	IB	3	2013	2010	1960	178
TCGA-IB-7654-01A	M0	N1	Ductal and Lobular Neoplasms	T2				NO	NO	80	Yes, Radiation Prior to Resection	YES	male		195.65.0	3	Scheduled Follow-up Submission	Three Tier				Cytology (e.g. Peritoneal or pleural fluid)	NO	3	3	12	7	G2	2	NA	NA	Yes, History of Prior Malignancy	Other malignancy	WITH TUMOR	NO	YES		NO	NA	Whipple	7th	NO	YES	IB	1	2013	2008	NA	178
TCGA-IB-7652-01A	M0	N1	Ductal and Lobular Neoplasms	T3	None		NO	NO	NO	49	No	YES	female		195.65.0	3	Scheduled Follow-up Submission					Tissue Biopsy	NO	20	4.2	12	7	G2	1	NA	NA	No		TUMOR FREE	YES	YES	Complete Remission/Response	NO	NA	Distal Pancreatectomy	7th	NO	YES	IB	1	2013	2011	NA	178
TCGA-IB-7651-01A	M0	N1	Ductal and Lobular Neoplasms	T3	Weekly Drinker	Progressive Disease	YES	NO	YES	64	No	YES	female		195.65.0	2	Scheduled Follow-up Submission					Cytology (e.g. Peritoneal or pleural fluid)	NO	8	2.9	12	7	G2	3	NA	20	No	Pancreatic Cancer	WITH TUMOR	YES	YES	Complete Remission/Response	NO	NA	Whipple	6th	NO	YES	IB	2	2013	2009	1989	178
TCGA-IB-7649-01A	M0	N1	Ductal and Lobular Neoplasms	T3				NO	NO	73	No	YES	female		195.65.0	2	Scheduled Follow-up Submission					Cytology (e.g. Peritoneal or pleural fluid)	NO	13	4	12	7	G2	5	NA	57	No			NO	YES	Partial Remission/Response	NO	NA	Whipple	6th	NO	YES	IB	2	2013	2007	1951	178
TCGA-IB-7647-01A	M0	N1	Ductal and Lobular Neoplasms	T3	Occasional Drinker		YES	NO	NO	41	No	YES	male		195.65.0	2	Scheduled Follow-up Submission					Cytology (e.g. Peritoneal or pleural fluid)	NO	20	6	12	7	G2	14	NA	NA	No	Pancreatic Cancer	WITH TUMOR	YES	YES	Progressive Disease	NO	NA	Whipple	6th	NO	YES	IB	1	2013	2008	NA	178
TCGA-IB-7646-01A	M0	N1	Ductal and Lobular Neoplasms	T3	Occasional Drinker		NO	NO	NO	60	No	YES	male		195.65.0	2	Scheduled Follow-up Submission					Cytology (e.g. Peritoneal or pleural fluid)	NO	6	4.5	12	7	G2	6	NA	NA	No	Pancreatic Cancer	WITH TUMOR	NO	YES	Partial Remission/Response	NO	NA	Whipple	6th	NO	YES	IB	1	2013	2007	NA	178
TCGA-IB-7645-01A	M0	N1	Ductal and Lobular Neoplasms	T3			NO	NO	NO	44	No	YES	female		210.65.0	8	Scheduled Follow-up Submission					Tumor resection	NO	17	4.5	12	5	G1	5	NA	NA	No	Pancreatic Cancer	WITH TUMOR	YES	YES	Progressive Disease	NO	NA	Whipple	6th	NO	YES	IB	1	2013	2007	NA	NA
TCGA-IB-7644-01A	M1	N1	Ductal and Lobular Neoplasms	T3	Occasional Drinker		NO	NO	YES	65	No	YES	female		195.65.0	2	Scheduled Follow-up Submission					Tumor resection	NO	8	2.3	12	7	G2	3	NA	30	No	Pancreatic Cancer	WITH TUMOR	YES	YES	Progressive Disease	NO	NA	Whipple	7th	NO	YES	IB	2	2013	2011	1981	178
TCGA-HZ-A9TJ-06A	M1	N0	Adenomas and Adenocarcinomas	T3		Progressive Disease				70	No	YES	male		424.46.0	1	Scheduled Follow-up Submission	Four Tier	Adenocarcinoma, NOS			Tumor resection	NO	1	8	12	5	G2	0	0	NA	No		WITH TUMOR	YES	YES		NO	NA	Total Pancreatectomy	7th	YES	NO	HZ	NA	2015	2013	NA	178
TCGA-HZ-A9TJ-01A	M1	N0	Adenomas and Adenocarcinomas	T3		Progressive Disease				70	No	YES	male		424.46.0	1	Scheduled Follow-up Submission	Four Tier	Adenocarcinoma, NOS			Tumor resection	NO	1	8	12	5	G2	0	0	NA	No		WITH TUMOR	YES	YES		NO	NA	Total Pancreatectomy	7th	YES	NO	HZ	NA	2015	2013	NA	178
TCGA-HZ-A8P1-01A	MX	N0	Ductal and Lobular Neoplasms	T2			NO	NO	NO	81	No	YES	male		390.52.0	NA		Four Tier		Partial Pancreatectomy		Tumor resection		5	5	12	NA	G1	0	NA	15	No				YES			1967	Other Method (please specify)	7th	YES	NO	HZ	3	NA	2013	1952	NA
TCGA-HZ-A77Q-01A	MX	N1	Adenomas and Adenocarcinomas	T3			NO	NO	YES	55	No	YES	female		369.54.0	NA		Four Tier	Adenocarcinoma, NOS			Tissue Biopsy		19	2.8	12	NA	G2	1	NA	15	Yes, History of Prior Malignancy				YES			NA	Whipple	7th	YES	NO	HZ	2	NA	2013	1983	178
TCGA-HZ-A77P-01A	MX	N1	Adenomas and Adenocarcinomas	T3		Complete Remission/Response	YES	NO	NO	77	No	YES	male		349.58.0	1	Scheduled Follow-up Submission	Four Tier	Adenocarcinoma, NOS			Tissue Biopsy	NO	21	3.1	12	10	G1	1	NA	NA	No		TUMOR FREE	YES	YES	Complete Remission/Response	NO	NA	Whipple	7th	YES	NO	HZ	1	2014	2013	NA	178
TCGA-HZ-A77O-01A	MX	N1	Ductal and Lobular Neoplasms	T2		Progressive Disease	NO	NO	NO	77	No	YES	female		349.58.0	25	Scheduled Follow-up Submission	Four Tier				Cytology (e.g. Peritoneal or pleural fluid)	NO	26	2.8	12	8	G2	4	NA	NA	No	Pancreatic Cancer	WITH TUMOR	NO	YES	Complete Remission/Response	NO	NA	Whipple	7th	YES	NO	HZ	1	2014	2013	NA	178
TCGA-HZ-A4BK-01A	MX	N1	Adenomas and Adenocarcinomas	T3		Progressive Disease				72	No	YES	male		284.63.0	29	Scheduled Follow-up Submission	Four Tier	Adenocarcinoma, NOS			Cytology (e.g. Peritoneal or pleural fluid)	NO	4	4.7	12	5	G3	2	NA	NA	Yes, History of Prior Malignancy		WITH TUMOR	YES	YES	Progressive Disease	YES	NA	Whipple	7th	YES	NO	HZ	NA	2014	2012	NA	178
TCGA-HZ-A4BH-01A	MX	N1b	Ductal and Lobular Neoplasms	T3						75	No	YES	male		284.63.0	30	Scheduled Follow-up Submission	Four Tier				Cytology (e.g. Peritoneal or pleural fluid)	YES	10	2.5	12	6	G3	4	NA	NA	No		WITH TUMOR		YES			NA	Whipple	7th	YES	NO	HZ	NA	2014	2011	NA	NA
TCGA-HZ-A49I-01A	MX	N1	Ductal and Lobular Neoplasms	T3		Progressive Disease				77	No	YES	male		284.63.0	29	Scheduled Follow-up Submission	Four Tier				Tumor resection	NO	9	5	12	5	G2	3	NA	NA	No	Pancreatic Cancer	WITH TUMOR	YES	YES	Progressive Disease	YES	NA	Whipple	7th	YES	NO	HZ	NA	2014	2012	NA	NA
TCGA-HZ-A49H-01A	MX	N1	Ductal and Lobular Neoplasms	T3						68	No	YES	female		284.63.0	27	Scheduled Follow-up Submission	Four Tier				Cytology (e.g. Peritoneal or pleural fluid)	NO	44	2.8	12	3	G2	1	NA	NA	No		TUMOR FREE	YES	YES	Complete Remission/Response	NO	NA	Whipple	7th	YES	NO	HZ	NA	2014	2012	NA	NA
TCGA-HZ-A49G-01A	MX	N1	Ductal and Lobular Neoplasms	T2		Progressive Disease				58	No	YES	female		284.63.0	29	Scheduled Follow-up Submission	Four Tier				Cytology (e.g. Peritoneal or pleural fluid)	NO	18	3	12	5	G2	3	NA	NA	No		WITH TUMOR	YES	YES	Progressive Disease	YES	NA	Whipple	7th	YES	NO	HZ	NA	2014	2012	NA	178
TCGA-HZ-8638-01A	MX	N0	Cystic, Mucinous and Serous Neoplasms	T1						84	No	YES	female		247.64.0	27	Scheduled Follow-up Submission					Tissue Biopsy	NO	12	0.3	12	3	GX	0	NA	NA	No	Surgical Complications	TUMOR FREE	NO	YES	Complete Remission/Response	NO	NA	Whipple	7th	YES	NO	HZ	NA	2014	2012	NA	178
TCGA-HZ-8637-01A	MX	N1	Ductal and Lobular Neoplasms	T3		Complete Remission/Response				76	No	YES	female		247.64.0	25	Scheduled Follow-up Submission	Four Tier				Tumor resection	NO	18	3.4	12	8	G3	1	NA	NA	No	Other, non-malignant disease	TUMOR FREE	YES	YES	Complete Remission/Response	YES	NA	Whipple	7th	YES	NO	HZ	NA	2014	2012	NA	178
TCGA-HZ-8636-01A	M1	N0	Ductal and Lobular Neoplasms	T3		Progressive Disease				58	No	YES	female		247.64.0	3	Scheduled Follow-up Submission	Four Tier		Pancreaticoduodenectomy		Tumor resection	NO	2	9	12	10	G3	0	NA	NA	No	Pancreatic Cancer	WITH TUMOR	YES	YES	Progressive Disease		NA	Other Method (please specify)	7th	YES	NO	HZ	NA	2014	2012	NA	178
TCGA-HZ-8519-01A	MX	N0	Adenomas and Adenocarcinomas	T1		Complete Remission/Response				73	No	YES	male		247.64.0	28	Scheduled Follow-up Submission	Four Tier	Adenocarcinoma, NOS			Tumor resection	NO	9	1.8	12	2	G3	0	NA	NA	No		TUMOR FREE	YES	YES	Complete Remission/Response	YES	NA	Whipple	7th	YES	NO	HZ	NA	2014	2012	NA	NA
TCGA-HZ-8317-01A	MX	N1	Ductal and Lobular Neoplasms	T3		Progressive Disease				69	No	YES	female		247.64.0	29	Scheduled Follow-up Submission				Fine Needle Aspiration Biopsy	Other method, specify:	NO	13	3.1	12	5	G1	4	NA	NA	No	Pancreatic Cancer	WITH TUMOR	YES	YES	Progressive Disease	YES	NA	Whipple	7th	YES	NO	HZ	NA	2014	2012	NA	178
TCGA-HZ-8315-01A	MX	N0	Ductal and Lobular Neoplasms	T3		Progressive Disease				54	No	YES	female		247.64.0	3	Scheduled Follow-up Submission	Four Tier			Fine Needle Aspiration Biopsy	Other method, specify:	NO	21	6	12	10	G2	0	NA	NA	No	Pancreatic Cancer	WITH TUMOR	YES	YES			NA	Whipple	7th	YES	NO	HZ	NA	2014	2012	NA	NA
TCGA-HZ-8005-01A	MX	N1	Ductal and Lobular Neoplasms	T3		Progressive Disease				81	No	YES	male	Head & Body of Pancreas	210.65.0	29	Scheduled Follow-up Submission					Tumor resection	NO	24	4.5	12	5	G3	8	NA	NA	No	Pancreatic Cancer	WITH TUMOR	NO	YES	Progressive Disease	NO	NA	Whipple	7th	YES	NO	HZ	NA	2014	2012	NA	178
TCGA-HZ-8003-01A	MX	N1	Ductal and Lobular Neoplasms	T3		Progressive Disease				65	No	YES	female		210.65.0	30	Scheduled Follow-up Submission						NO	12	2.8	12	9	G2	1	NA	NA	No	Pancreatic Cancer	WITH TUMOR	YES	YES	Complete Remission/Response	NO	NA	Whipple	7th	YES	NO	HZ	NA	2014	2011	NA	178
TCGA-HZ-8002-01A	MX	N1	Ductal and Lobular Neoplasms	T3						61	No	YES	male		210.65.0	30	Scheduled Follow-up Submission						NO	33	3.1	12	9	G2	4	NA	NA	No		WITH TUMOR	YES	YES		NO	NA	Whipple	7th	YES	NO	HZ	NA	2014	2011	NA	178
TCGA-HZ-8001-01A	MX	N0	Ductal and Lobular Neoplasms	T4						69	No	YES	male		210.65.0	27	Scheduled Follow-up Submission						NO	16	3	12	3	G2	0	NA	NA	No		TUMOR FREE	YES	YES	Complete Remission/Response	NO	NA	Whipple	7th	YES	NO	HZ	NA	2014	2011	NA	178
TCGA-HZ-7926-01A	MX	N1	Ductal and Lobular Neoplasms	T3		Progressive Disease				57	No	YES	male		195.65.0	30	Scheduled Follow-up Submission					Cytology (e.g. Peritoneal or pleural fluid)	NO	13	3.5	12	9	G1	2	NA	NA	No	Pancreatic Cancer	WITH TUMOR		YES	Progressive Disease		NA	Whipple	7th	YES	NO	HZ	NA	2014	2011	NA	178
TCGA-HZ-7925-01A	MX	N1	Ductal and Lobular Neoplasms	T3		Progressive Disease				66	No	YES	male		195.65.0	30	Scheduled Follow-up Submission						NO	19	4.7	12	9	G2	2	NA	NA	No	Pancreatic Cancer	WITH TUMOR	YES	YES	Complete Remission/Response	NO	NA	Whipple	7th	YES	NO	HZ	NA	2014	2011	NA	178
TCGA-HZ-7924-01A	MX	N0	Ductal and Lobular Neoplasms	T3		Progressive Disease				60	No	YES	female		195.65.0	27	Scheduled Follow-up Submission					Tissue Biopsy	NO	17	5	12	3	G2	0	NA	NA	No		WITH TUMOR	YES	YES	Complete Remission/Response	NO	NA	Whipple	7th	YES	NO	HZ	NA	2014	2011	NA	178
TCGA-HZ-7923-01A	MX	N0	Ductal and Lobular Neoplasms	T3		Complete Remission/Response				65	No	YES	male		195.65.0	30	Scheduled Follow-up Submission					Tumor resection	NO	17	3	12	9	G2	0	NA	NA	No		TUMOR FREE	YES	YES	Complete Remission/Response	NO	NA	Whipple	7th	YES	NO	HZ	NA	2014	2011	NA	178
TCGA-HZ-7922-01A	MX	N1	Ductal and Lobular Neoplasms	T3						61	No	YES	female		195.65.0	NA		Four Tier				Tumor resection		15	3	12	NA	G1	3	NA	NA	No				YES			NA	Whipple	7th	YES	NO	HZ	NA	NA	2011	NA	NA
TCGA-HZ-7920-01A	MX	N0	Ductal and Lobular Neoplasms	T2		Complete Remission/Response				71	No	YES	male		210.65.0	25	Scheduled Follow-up Submission					Tumor resection	NO	12	3.2	12	8	G2	0	NA	NA	No	Other, non-malignant disease	TUMOR FREE	YES	YES	Complete Remission/Response	YES	NA	Whipple	7th	YES	NO	HZ	NA	2014	2011	NA	178
TCGA-HZ-7919-01A	M0	N1	Ductal and Lobular Neoplasms	T3		Progressive Disease				52	No	YES	female		195.65.0	3	Scheduled Follow-up Submission	Four Tier				Cytology (e.g. Peritoneal or pleural fluid)	NO	10	4	12	10	G2	2	NA	NA	No	Pancreatic Cancer	WITH TUMOR		YES			NA	Whipple	7th	YES	NO	HZ	NA	2014	2011	NA	178
TCGA-HZ-7918-01A	M0	N1	Ductal and Lobular Neoplasms	T3		Stable Disease				72	No	YES	male		195.65.0	30	Scheduled Follow-up Submission					Cytology (e.g. Peritoneal or pleural fluid)	NO	22	5.5	12	9	G3	11	NA	NA	No		WITH TUMOR	YES	YES	Complete Remission/Response	YES	NA	Whipple	7th	YES	NO	HZ	NA	2014	2011	NA	178
TCGA-HZ-7289-01A	MX	N1	Adenomas and Adenocarcinomas	T3		Progressive Disease				77	No	YES	male		195.65.0	25	Scheduled Follow-up Submission		Adenocarcinoma, NOS			Tissue Biopsy	NO	9	4.5	12	8	G1	1	NA	NA	Yes, History of Prior Malignancy	Pancreatic Cancer	WITH TUMOR	NO	YES		NO	NA	Whipple	7th	YES	NO	HZ	NA	2014	2010	NA	178
TCGA-HV-AA8X-01A	MX	N1	Ductal and Lobular Neoplasms	T2		Stable Disease		NO	NO	75	No	YES	female		410.47.0	30		Three Tier				Tumor resection		11	NA	12	4	G2	3	NA	NA	No		WITH TUMOR	YES	YES	Stable Disease	NO	NA	Distal Pancreatectomy	7th	NO	YES	HV	1	2015	2013	NA	NA
TCGA-HV-AA8V-01A	MX	N1	Ductal and Lobular Neoplasms	T3	Weekly Drinker	Stable Disease		NO	NO	50	No	YES	male		424.46.0	30		Three Tier		Radical pancreaticoduodenectomy		Tumor resection	NO	20	NA	12	4	G3	3	NA	60	No			YES	YES		NO	NA	Other Method (please specify)	7th	NO	YES	HV	4	2015	2012	NA	NA
TCGA-HV-A7OP-01A	M0	N1	Ductal and Lobular Neoplasms	T3	Weekly Drinker	Partial Remission/Response	NO	NO	NO	72	No	YES	male		349.58.0	30	Scheduled Follow-up Submission	Three Tier	Intraductal tubulopapillary neoplasm			Tumor resection	NO	28	6.5	12	4	GX	7	NA	NA	No			YES	YES		YES	NA	Whipple	7th	NO	YES	HV	1	2015	2012	NA	NA
TCGA-HV-A7OL-01A	MX	N0	Ductal and Lobular Neoplasms	T3	Daily Drinker	Stable Disease		NO	YES	70	No	YES	male		349.58.0	30		Three Tier		Radical pancreaticoduodenectomy		Tumor resection	YES	NA	NA	12	4	G2	NA	NA	NA	No			NO	NO	Stable Disease	NO	NA	Other Method (please specify)	7th	NO	YES	HV	1	2015	2012	NA	178
TCGA-HV-A5A6-01A	M0	N1b	Ductal and Lobular Neoplasms	T3				NO	NO	65	No	YES	female		284.63.0	3	Scheduled Follow-up Submission					Tumor resection	YES	22	NA	12	11	G1	2	NA	NA	No	Other malignancy	WITH TUMOR	YES	YES	Progressive Disease	NO	NA		7th	NO	YES	HV	1	2014	2001	NA	178
TCGA-HV-A5A5-01A	M0	N1	Ductal and Lobular Neoplasms	T3				NO	NO	61	No	YES	female		284.63.0	NA		Three Tier		Radical聽pancreaticoduodenectomy		Tumor resection		19	NA	12	NA	G2	2	NA	NA	No				YES			NA	Other Method (please specify)	7th	NO	YES	HV	1	NA	2012	NA	NA
TCGA-HV-A5A4-01A	MX	N0	Ductal and Lobular Neoplasms	T3				NO	NO	72	No	YES	female		284.63.0	NA		Three Tier				Tumor resection		18	NA	12	NA	G2	1	NA	NA	No							NA	Distal Pancreatectomy	7th	NO	YES	HV	1	NA	2012	NA	NA
TCGA-HV-A5A3-11A	MX	NX	Ductal and Lobular Neoplasms	T3	Occasional Drinker			NO	NO	50	No	YES	male		284.63.0	NA		Three Tier				Tumor resection		25	NA	12	NA	G2	5	NA	NA	No				YES			2002	Distal Pancreatectomy	7th	NO	YES	HV	NA	NA	2012	NA	NA
TCGA-HV-A5A3-01A	MX	NX	Ductal and Lobular Neoplasms	T3	Occasional Drinker			NO	NO	50	No	YES	male		284.63.0	NA		Three Tier				Tumor resection		25	NA	12	NA	G2	5	NA	NA	No				YES			2002	Distal Pancreatectomy	7th	NO	YES	HV	NA	NA	2012	NA	NA
TCGA-H8-A6C1-01A	MX	N0	Adenomas and Adenocarcinomas	T3	Occasional Drinker		YES	NO	NO	53	No	YES	male		330.58.0	21	Scheduled Follow-up Submission	Three Tier	not specified			Cytology (e.g. Peritoneal or pleural fluid)	NO	21	3.1	12	8	G2	0	0	30	No		WITH TUMOR	YES	YES	Complete Remission/Response	NO	2012	Whipple	7th	YES	NO	H8	4	2014	2012	1982	NA
TCGA-H6-A45N-11A	MX	N1	Adenomas and Adenocarcinomas	T3	Daily Drinker	Progressive Disease	YES	NO	NO	88	No	YES	female		284.63.0	26	Scheduled Follow-up Submission		Poorly differentiated pancreatic adenocarcinoma		Fine Needle Aspiration	Other method, specify:	NO	12	9	12	3	G3	1	0	1	Yes, History of Prior Malignancy	Pancreatic Cancer	WITH TUMOR	NO	YES	Progressive Disease	NO	NA	Distal Pancreatectomy	7th	YES	NO	H6	3	2013	2012	NA	NA
TCGA-H6-A45N-01A	MX	N1	Adenomas and Adenocarcinomas	T3	Daily Drinker	Progressive Disease	YES	NO	NO	88	No	YES	female		284.63.0	26	Scheduled Follow-up Submission		Poorly differentiated pancreatic adenocarcinoma		Fine Needle Aspiration	Other method, specify:	NO	12	9	12	3	G3	1	0	1	Yes, History of Prior Malignancy	Pancreatic Cancer	WITH TUMOR	NO	YES	Progressive Disease	NO	NA	Distal Pancreatectomy	7th	YES	NO	H6	3	2013	2012	NA	NA
TCGA-H6-8124-11A	M0	N1	Adenomas and Adenocarcinomas	T3	Occasional Drinker		YES	NO	NO	56	No	YES	female		247.64.0	3	Scheduled Follow-up Submission	Three Tier				Tumor resection	NO	9	3	12	1	G3	2	0	3.5	No		WITH TUMOR	YES	YES	Complete Remission/Response	YES	1976	Whipple	7th	YES	NO	H6	3	2013	2011	1969	178
TCGA-H6-8124-01A	M0	N1	Adenomas and Adenocarcinomas	T3	Occasional Drinker		YES	NO	NO	56	No	YES	female		247.64.0	3	Scheduled Follow-up Submission	Three Tier				Tumor resection	NO	9	3	12	1	G3	2	0	3.5	No		WITH TUMOR	YES	YES	Complete Remission/Response	YES	1976	Whipple	7th	YES	NO	H6	3	2013	2011	1969	178
TCGA-FZ-5926-11A	M0	N1	Ductal and Lobular Neoplasms	T3		Progressive Disease				73	No	YES	female		106.63.0	3	Scheduled Follow-up Submission					Cytology (e.g. Peritoneal or pleural fluid)	NO	18	1.5	12	10	G2	8	NA	NA	No		WITH TUMOR	NO	YES	Progressive Disease	NO	NA	Whipple	5th	YES	NO	FZ	5	2013	2001	NA	NA
TCGA-FZ-5926-01A	M0	N1	Ductal and Lobular Neoplasms	T3		Progressive Disease				73	No	YES	female		106.63.0	3	Scheduled Follow-up Submission					Cytology (e.g. Peritoneal or pleural fluid)	NO	18	1.5	12	10	G2	8	NA	NA	No		WITH TUMOR	NO	YES	Progressive Disease	NO	NA	Whipple	5th	YES	NO	FZ	5	2013	2001	NA	NA
TCGA-FZ-5924-11A	M0	N1	Ductal and Lobular Neoplasms	T3		Progressive Disease				83	No	YES	male		106.63.0	3	Scheduled Follow-up Submission			Pancreaticoduodenectomy		Cytology (e.g. Peritoneal or pleural fluid)	NO	18	3.2	12	10	G3	2	NA	NA	Yes, History of Prior Malignancy		WITH TUMOR	YES	YES	Progressive Disease	NO	NA	Other Method (please specify)	6th	YES	NO	FZ	1	2013	2008	NA	178
TCGA-FZ-5924-01A	M0	N1	Ductal and Lobular Neoplasms	T3		Progressive Disease				83	No	YES	male		106.63.0	3	Scheduled Follow-up Submission			Pancreaticoduodenectomy		Cytology (e.g. Peritoneal or pleural fluid)	NO	18	3.2	12	10	G3	2	NA	NA	Yes, History of Prior Malignancy		WITH TUMOR	YES	YES	Progressive Disease	NO	NA	Other Method (please specify)	6th	YES	NO	FZ	1	2013	2008	NA	178
TCGA-FZ-5923-11A	M1	N1	Ductal and Lobular Neoplasms	T4		Progressive Disease	YES			71	No	YES	male		106.63.0	3	Scheduled Follow-up Submission					Tissue Biopsy	NO	13	3.8	12	10	G1	1	NA	NA	No		WITH TUMOR	YES	YES	Progressive Disease	NO	NA	Whipple	6th	YES	NO	FZ	1	2013	2008	NA	NA
TCGA-FZ-5923-01A	M1	N1	Ductal and Lobular Neoplasms	T4		Progressive Disease	YES			71	No	YES	male		106.63.0	3	Scheduled Follow-up Submission					Tissue Biopsy	NO	13	3.8	12	10	G1	1	NA	NA	No		WITH TUMOR	YES	YES	Progressive Disease	NO	NA	Whipple	6th	YES	NO	FZ	1	2013	2008	NA	NA
TCGA-FZ-5922-11A	M0	N0	Ductal and Lobular Neoplasms	T3				NO	NO	81	No	YES	male		106.63.0	3	Scheduled Follow-up Submission					Cytology (e.g. Peritoneal or pleural fluid)	NO	5	1.8	12	10	G2	0	NA	NA	No		WITH TUMOR	YES	YES	Progressive Disease	NO	NA	Whipple	6th	YES	NO	FZ	NA	2013	2007	NA	178
TCGA-FZ-5922-01A	M0	N0	Ductal and Lobular Neoplasms	T3				NO	NO	81	No	YES	male		106.63.0	3	Scheduled Follow-up Submission					Cytology (e.g. Peritoneal or pleural fluid)	NO	5	1.8	12	10	G2	0	NA	NA	No		WITH TUMOR	YES	YES	Progressive Disease	NO	NA	Whipple	6th	YES	NO	FZ	NA	2013	2007	NA	178
TCGA-FZ-5921-11A	M0	N1	Ductal and Lobular Neoplasms	T3						85	No	YES	female		106.63.0	NA						Cytology (e.g. Peritoneal or pleural fluid)		10	NA	12	NA	GX	1	NA	NA	No				YES			NA	Whipple	6th	NO	YES	FZ	NA	NA	2007	NA	NA
TCGA-FZ-5921-01A	M0	N1	Ductal and Lobular Neoplasms	T3						85	No	YES	female		106.63.0	NA						Cytology (e.g. Peritoneal or pleural fluid)		10	NA	12	NA	GX	1	NA	NA	No				YES			NA	Whipple	6th	NO	YES	FZ	NA	NA	2007	NA	NA
TCGA-FZ-5920-11A	M0	N1	Ductal and Lobular Neoplasms	T3						52	No	YES	male		106.63.0	3	Scheduled Follow-up Submission					Cytology (e.g. Peritoneal or pleural fluid)	YES	9	3.5	12	10	G3	3	NA	NA	No			NO	YES		NO	NA	Whipple	6th	YES	NO	FZ	NA	2013	2007	NA	178
TCGA-FZ-5920-01A	M0	N1	Ductal and Lobular Neoplasms	T3						52	No	YES	male		106.63.0	3	Scheduled Follow-up Submission					Cytology (e.g. Peritoneal or pleural fluid)	YES	9	3.5	12	10	G3	3	NA	NA	No			NO	YES		NO	NA	Whipple	6th	YES	NO	FZ	NA	2013	2007	NA	178
TCGA-FZ-5919-11A	MX	N1	Ductal and Lobular Neoplasms	T3			YES		NO	59	No	YES	female		106.63.0	NA						Cytology (e.g. Peritoneal or pleural fluid)		11	NA	12	NA	G3	9	NA	NA	No				YES			NA	Whipple	6th	YES	NO	FZ	1	NA	2007	NA	178
TCGA-FZ-5919-01A	MX	N1	Ductal and Lobular Neoplasms	T3			YES		NO	59	No	YES	female		106.63.0	NA						Cytology (e.g. Peritoneal or pleural fluid)		11	NA	12	NA	G3	9	NA	NA	No				YES			NA	Whipple	6th	YES	NO	FZ	1	NA	2007	NA	178
TCGA-FB-AAQ6-11A	MX	N0	Ductal and Lobular Neoplasms	T1	None	Progressive Disease		NO	NO	85	No	YES	male		424.46.0	15	Scheduled Follow-up Submission	Four Tier				Tissue Biopsy	NO	9	2	12	9	G2	0	NA	NA	Yes, History of Prior Malignancy	Pancreatic Cancer	WITH TUMOR	YES	YES	Progressive Disease	NO	1952	Distal Pancreatectomy	7th	NO	YES	FB	3	2014	2011	NA	NA
TCGA-FB-AAQ6-01A	MX	N0	Ductal and Lobular Neoplasms	T1	None	Progressive Disease		NO	NO	85	No	YES	male		424.46.0	15	Scheduled Follow-up Submission	Four Tier				Tissue Biopsy	NO	9	2	12	9	G2	0	NA	NA	Yes, History of Prior Malignancy	Pancreatic Cancer	WITH TUMOR	YES	YES	Progressive Disease	NO	1952	Distal Pancreatectomy	7th	NO	YES	FB	3	2014	2011	NA	NA
TCGA-FB-AAQ3-11A	MX	N1	Ductal and Lobular Neoplasms	T3	None		YES	NO	NO	65	No	YES	female		424.46.0	NA		Four Tier				Tumor resection		23	2.5	12	NA	G2	1	NA	NA	No				YES			NA	Whipple	7th	NO	YES	FB	1	NA	2010	NA	NA
TCGA-FB-AAQ3-01A	MX	N1	Ductal and Lobular Neoplasms	T3	None		YES	NO	NO	65	No	YES	female		424.46.0	NA		Four Tier				Tumor resection		23	2.5	12	NA	G2	1	NA	NA	No				YES			NA	Whipple	7th	NO	YES	FB	1	NA	2010	NA	NA
TCGA-FB-AAQ2-11A	MX	N1	Ductal and Lobular Neoplasms	T3	None	Progressive Disease	NO	NO	YES	81	No	YES	female		424.46.0	15	Scheduled Follow-up Submission	Four Tier				Tissue Biopsy	NO	23	5.5	12	9	G3	2	NA	NA	No		WITH TUMOR	NO	YES	Progressive Disease	NO	NA	Whipple	7th	NO	YES	FB	1	2014	2011	NA	NA
TCGA-FB-AAQ2-01A	MX	N1	Ductal and Lobular Neoplasms	T3	None	Progressive Disease	NO	NO	YES	81	No	YES	female		424.46.0	15	Scheduled Follow-up Submission	Four Tier				Tissue Biopsy	NO	23	5.5	12	9	G3	2	NA	NA	No		WITH TUMOR	NO	YES	Progressive Disease	NO	NA	Whipple	7th	NO	YES	FB	1	2014	2011	NA	NA
TCGA-FB-AAQ1-11A	MX	N1	Ductal and Lobular Neoplasms	T3		Partial Remission/Response		NO	NO	49	No	YES	male		424.46.0	18	Scheduled Follow-up Submission	Four Tier				Tumor resection	NO	27	6	12	9	G2	3	NA	NA	No		WITH TUMOR	NO	YES	Stable Disease	NO	2005	Whipple	7th	NO	YES	FB	4	2014	2011	NA	NA
TCGA-FB-AAQ1-01A	MX	N1	Ductal and Lobular Neoplasms	T3		Partial Remission/Response		NO	NO	49	No	YES	male		424.46.0	18	Scheduled Follow-up Submission	Four Tier				Tumor resection	NO	27	6	12	9	G2	3	NA	NA	No		WITH TUMOR	NO	YES	Stable Disease	NO	2005	Whipple	7th	NO	YES	FB	4	2014	2011	NA	NA
TCGA-FB-AAQ0-11A	MX	N0	Ductal and Lobular Neoplasms	T3		Complete Remission/Response	YES	NO	YES	68	No	YES	male		424.46.0	15	Scheduled Follow-up Submission	Four Tier				Tumor resection	NO	18	2.7	12	9	G3	0	NA	NA	No		TUMOR FREE	NO	YES	Complete Remission/Response	NO	NA	Whipple	7th	NO	YES	FB	1	2014	2011	NA	178
TCGA-FB-AAQ0-01A	MX	N0	Ductal and Lobular Neoplasms	T3		Complete Remission/Response	YES	NO	YES	68	No	YES	male		424.46.0	15	Scheduled Follow-up Submission	Four Tier				Tumor resection	NO	18	2.7	12	9	G3	0	NA	NA	No		TUMOR FREE	NO	YES	Complete Remission/Response	NO	NA	Whipple	7th	NO	YES	FB	1	2014	2011	NA	178
TCGA-FB-AAPZ-11A	MX	N1	Ductal and Lobular Neoplasms	T2		Progressive Disease	YES	NO	NO	54	No	YES	male		424.46.0	23	Scheduled Follow-up Submission	Three Tier				Tissue Biopsy	NO	12	3.8	12	12	G3	1	NA	NA	No			YES	YES	Complete Remission/Response	NO	NA	Whipple	7th	NO	YES	FB	1	2014	2008	NA	NA
TCGA-FB-AAPZ-01A	MX	N1	Ductal and Lobular Neoplasms	T2		Progressive Disease	YES	NO	NO	54	No	YES	male		424.46.0	23	Scheduled Follow-up Submission	Three Tier				Tissue Biopsy	NO	12	3.8	12	12	G3	1	NA	NA	No			YES	YES	Complete Remission/Response	NO	NA	Whipple	7th	NO	YES	FB	1	2014	2008	NA	NA
TCGA-FB-AAPY-11A	MX	N1	Ductal and Lobular Neoplasms	T2	Social Drinker	Complete Remission/Response	YES		YES	71	No	YES	male		424.46.0	15	Scheduled Follow-up Submission	Three Tier				Tissue Biopsy	NO	9	3.5	12	9	G2	2	NA	25	No		TUMOR FREE	YES	YES	Complete Remission/Response	YES	1985	Whipple	7th	NO	YES	FB	3	2014	2007	1960	NA
TCGA-FB-AAPY-01A	MX	N1	Ductal and Lobular Neoplasms	T2	Social Drinker	Complete Remission/Response	YES		YES	71	No	YES	male		424.46.0	15	Scheduled Follow-up Submission	Three Tier				Tissue Biopsy	NO	9	3.5	12	9	G2	2	NA	25	No		TUMOR FREE	YES	YES	Complete Remission/Response	YES	1985	Whipple	7th	NO	YES	FB	3	2014	2007	1960	NA
TCGA-FB-AAPU-11A	MX	N0	Ductal and Lobular Neoplasms	T3	None	Progressive Disease		YES	NO	41	No	YES	female		424.46.0	15	Scheduled Follow-up Submission	Three Tier				Tumor resection	NO	12	4	12	9	G2	0	NA	NA	No	Pancreatic Cancer	WITH TUMOR	NO	YES	Progressive Disease	NO	NA	Whipple	7th	NO	YES	FB	1	2014	2008	NA	NA
TCGA-FB-AAPU-01A	MX	N0	Ductal and Lobular Neoplasms	T3	None	Progressive Disease		YES	NO	41	No	YES	female		424.46.0	15	Scheduled Follow-up Submission	Three Tier				Tumor resection	NO	12	4	12	9	G2	0	NA	NA	No	Pancreatic Cancer	WITH TUMOR	NO	YES	Progressive Disease	NO	NA	Whipple	7th	NO	YES	FB	1	2014	2008	NA	NA
TCGA-FB-AAPS-11A	MX	N1	Ductal and Lobular Neoplasms	T2				NO	NO	62	No	YES	female		410.47.0	18	Scheduled Follow-up Submission	Three Tier				Tumor resection	YES	7	3	12	9	G2	1	NA	10	No				YES		YES	1970	Whipple	7th	NO	YES	FB	3	2014	2008	1960	NA
TCGA-FB-AAPS-01A	MX	N1	Ductal and Lobular Neoplasms	T2				NO	NO	62	No	YES	female		410.47.0	18	Scheduled Follow-up Submission	Three Tier				Tumor resection	YES	7	3	12	9	G2	1	NA	10	No				YES		YES	1970	Whipple	7th	NO	YES	FB	3	2014	2008	1960	NA
TCGA-FB-AAPQ-11A	MX	N1	Ductal and Lobular Neoplasms	T3				NO	YES	65	No	YES	male		424.46.0	15	Scheduled Follow-up Submission	Three Tier				Tissue Biopsy	NO	24	5	12	9	G2	4	NA	25	No			YES	YES	Progressive Disease	NO	2008	Whipple	7th	NO	YES	FB	4	2014	2008	1983	NA
TCGA-FB-AAPQ-01A	MX	N1	Ductal and Lobular Neoplasms	T3				NO	YES	65	No	YES	male		424.46.0	15	Scheduled Follow-up Submission	Three Tier				Tissue Biopsy	NO	24	5	12	9	G2	4	NA	25	No			YES	YES	Progressive Disease	NO	2008	Whipple	7th	NO	YES	FB	4	2014	2008	1983	NA
TCGA-FB-AAPP-11A	MX	N1	Ductal and Lobular Neoplasms	T3	Social Drinker	Progressive Disease	YES	NO	NO	71	No	YES	male		424.46.0	15	Scheduled Follow-up Submission					Tissue Biopsy	NO	7	5.5	12	9	G3	3	NA	NA	No	Pancreatic Cancer	WITH TUMOR	YES	YES	Progressive Disease	YES	1974	Whipple	7th	NO	YES	FB	3	2014	2009	NA	NA
TCGA-FB-AAPP-01A	MX	N1	Ductal and Lobular Neoplasms	T3	Social Drinker	Progressive Disease	YES	NO	NO	71	No	YES	male		424.46.0	15	Scheduled Follow-up Submission					Tissue Biopsy	NO	7	5.5	12	9	G3	3	NA	NA	No	Pancreatic Cancer	WITH TUMOR	YES	YES	Progressive Disease	YES	1974	Whipple	7th	NO	YES	FB	3	2014	2009	NA	NA
TCGA-FB-A7DR-01A	M0	NX	Cystic, Mucinous and Serous Neoplasms	T3	Weekly Drinker	Progressive Disease	NO		NO	48	No	YES	male		349.58.0	25	Scheduled Follow-up Submission	Four Tier				Tissue Biopsy	NO	NA	3	12	6	G2	NA	NA	20	No	Pancreatic Cancer			NO	Complete Remission/Response	NO	NA	Total Pancreatectomy	7th	YES	NO	FB	2	2014	2012	1993	NA
TCGA-FB-A78T-01A	M0	N1	Ductal and Lobular Neoplasms	T3			YES		NO	71	No	YES	female		330.58.0	27	Scheduled Follow-up Submission	Three Tier				Tumor resection	NO	22	3.5	12	5	G2	4	NA	2	No	Pancreatic Cancer		YES	YES	Complete Remission/Response	NO	2000	Whipple	7th	YES	NO	FB	4	2014	2013	1980	178
TCGA-FB-A5VM-01A	M0	N0	Ductal and Lobular Neoplasms	T2	Occasional Drinker	Progressive Disease	NO	NO	YES	74	No	YES	male		330.58.0	24	Scheduled Follow-up Submission	Three Tier				Tumor resection	NO	35	4.5	12	2	G3	0	NA	24	No		WITH TUMOR	YES	YES	Progressive Disease	NO	2000	Whipple	7th	YES	NO	FB	4	2014	2012	1953	NA
TCGA-FB-A545-01A	M0	N1	Ductal and Lobular Neoplasms	T3		Progressive Disease	YES		NO	72	No	YES	female		284.63.0	15	Scheduled Follow-up Submission	Four Tier				Tumor resection	NO	28	NA	12	10	G2	4	NA	NA	No		WITH TUMOR	YES	YES	Complete Remission/Response	YES	NA	Distal Pancreatectomy	7th	YES	NO	FB	1	2013	2012	NA	NA
TCGA-FB-A4P6-01A	MX	N1	Ductal and Lobular Neoplasms	T3	None		NO	NO	NO	54	No	YES	male		284.63.0	8	Scheduled Follow-up Submission					Tumor resection	NO	46	4.5	12	8	G1	1	NA	25	No		TUMOR FREE	YES	YES		YES	2012	Whipple	7th	YES	NO	FB	4	2013	2012	1987	NA
TCGA-FB-A4P5-01A	MX	N1	Ductal and Lobular Neoplasms	T3			YES	NO	NO	69	No	YES	female		284.63.0	7	Scheduled Follow-up Submission					Tumor resection	NO	40	4.5	12	8	G2	4	NA	40	No		WITH TUMOR	YES	YES			2008	Whipple	7th	YES	NO	FB	4	2013	2012	1968	NA
TCGA-F2-A8YN-01A	M0	N0	Ductal and Lobular Neoplasms	T3	Occasional Drinker	Stable Disease	YES	NO	YES	76	No	YES	male		390.52.0	26	Scheduled Follow-up Submission					Tissue Biopsy	NO	13	4.8	12	1	G2	0	NA	60	No		WITH TUMOR	YES	YES	Progressive Disease	NO	1983	Whipple	7th	YES	NO	F2	3	2015	2013	NA	NA
TCGA-F2-A7TX-01A	M0	N1	Ductal and Lobular Neoplasms	T3	Daily Drinker		YES	NO	YES	77	No	YES	male		392.50.0	NA						Cytology (e.g. Peritoneal or pleural fluid)		19	3.6	12	NA	G3	7	NA	NA	No				YES			1958	Whipple	7th	YES	NO	F2	3	NA	2013	NA	NA
TCGA-F2-A44H-01A	M0	N0	Adenomas and Adenocarcinomas	T3		Complete Remission/Response	YES	NO	YES	65	No	YES	male		284.63.0	15	Scheduled Follow-up Submission					Tissue Biopsy	NO	8	3.5	12	1	G2	0	NA	NA	No		TUMOR FREE	YES	YES	Complete Remission/Response	YES	NA	Whipple	7th	YES	NO	F2	1	2014	2012	NA	178
TCGA-F2-A44G-01A	M0	N1	Adenomas and Adenocarcinomas	T3	Daily Drinker		NO	NO	NO	79	No	YES	female		284.63.0	26	Scheduled Follow-up Submission					Tumor resection	NO	16	3.5	12	8	G2	3	NA	NA	Yes, History of Prior Malignancy	Pancreatic Cancer	WITH TUMOR	YES	YES	Complete Remission/Response	YES	NA	Whipple	7th	YES	NO	F2	2	2013	2012	NA	178
TCGA-F2-7276-01A	M0	N1	Adenomas and Adenocarcinomas	T3			YES	NO	YES	64	No	YES	male		195.65.0	11	Scheduled Follow-up Submission	Four Tier				Tumor resection	NO	17	5.5	12	6	G1	9	NA	NA	No	Pancreatic Cancer	WITH TUMOR	YES	YES	Progressive Disease	NO	NA	Whipple	7th	YES	NO	F2	1	2012	2011	NA	178
TCGA-F2-7273-01A	M0	N1	Adenomas and Adenocarcinomas	T3		Stable Disease	NO	NO	NO	54	No	YES	male		195.65.0	11	Scheduled Follow-up Submission	Four Tier				Tumor resection	NO	32	4.2	12	6	G3	3	NA	NA	No		WITH TUMOR	YES	YES	Progressive Disease	YES	NA	Whipple	7th	YES	NO	F2	3	2012	2011	NA	178
TCGA-F2-6880-01A	M0	N1	Adenomas and Adenocarcinomas	T3	Daily Drinker		NO	NO	YES	70	No	YES	male		195.65.0	11	Scheduled Follow-up Submission	Four Tier				Tumor resection	YES	9	2.2	12	6	G1	1	NA	15	No				YES			1984	Whipple	6th	NO	YES	F2	3	2012	2009	NA	178
TCGA-F2-6879-01A	M0	N1	Adenomas and Adenocarcinomas	T3	Daily Drinker	Partial Remission/Response	YES	NO	NO	57	No	YES	male		195.65.0	11	Scheduled Follow-up Submission	Four Tier	Adenocarcinoma, NOS			Tumor resection	NO	11	4.5	12	6	G2	2	NA	NA	No		WITH TUMOR	NO	YES	Complete Remission/Response	NO	2000	Whipple	6th	NO	YES	F2	4	2012	2009	NA	178
TCGA-3E-AAAZ-01A	MX	N0	Ductal and Lobular Neoplasms	T3						71	No	YES	male		392.50.0	NA				Pancreatoduodenectomy		Tumor resection		10	3.2	12	NA	G2	0	0	NA	No				YES			NA	Other Method (please specify)	6th	NO	YES	3E	5	NA	2008	NA	NA
TCGA-3E-AAAY-01A	MX	N1	Ductal and Lobular Neoplasms	T3	None			NO	NO	67	No	YES	male	Head and body	392.50.0	13	Scheduled Follow-up Submission			Pancreatoduodenectomy		Tumor resection	NO	23	3	12	11	G3	5	NA	NA	No			YES	YES	Complete Remission/Response	NO	NA	Other Method (please specify)	6th	NO	YES	3E	5	2014	2008	NA	NA
TCGA-3A-A9J0-01A	MX	N1	Ductal and Lobular Neoplasms	T3			NO	NO	NO	75	No	YES	male		424.46.0	29	Scheduled Follow-up Submission	Four Tier				Tissue Biopsy	NO	14	4	12	12	G2	5	0	NA	No		WITH TUMOR	YES	YES		NO	NA	Whipple	7th	NO	YES	3A	1	2014	2012	NA	NA
TCGA-3A-A9IZ-01A	MX	N1	Ductal and Lobular Neoplasms	T3			NO	NO	NO	47	No	YES	male		424.46.0	NA		Four Tier				Tissue Biopsy		21	4	12	NA	G2	3	0	NA	No				YES			NA	Whipple	7th	NO	YES	3A	1	NA	2012	NA	NA
TCGA-3A-A9IX-01A	MX	N0	Ductal and Lobular Neoplasms	T1	Social Drinker	Complete Remission/Response	NO	NO	YES	40	No	YES	male		424.46.0	31	Scheduled Follow-up Submission	Four Tier				Tissue Biopsy	NO	35	2	12	12	G2	0	0	2.3	No		TUMOR FREE	YES	YES	Complete Remission/Response	YES	2010	Whipple	7th	NO	YES	3A	4	2014	2012	1988	178
TCGA-3A-A9IV-01A	MX	N0	Adenomas and Adenocarcinomas	T2	Social Drinker	Complete Remission/Response	YES	NO	NO	59	No	YES	female		424.46.0	31	Scheduled Follow-up Submission	Four Tier	NEUROENDOCRINE CARCINOMA	Subtotal Pancreatectomy		Tissue Biopsy	NO	16	3	12	12	G1	0	0	NA	No		TUMOR FREE	NO	YES	Complete Remission/Response	NO	NA	Other Method (please specify)	7th	NO	YES	3A	1	2014	2011	NA	178
TCGA-3A-A9IU-01A	MX	N1	Ductal and Lobular Neoplasms	T3	Occasional Drinker		NO	NO	NO	65	No	YES	male		410.47.0	NA		Four Tier				Tissue Biopsy		25	4	12	NA	G3	2	0	NA	No				YES			NA	Whipple	7th	NO	YES	3A	1	NA	2011	NA	NA
TCGA-3A-A9IS-01A	MX	N0	Adenomas and Adenocarcinomas	T2			NO	NO	NO	67	No	YES	male		410.47.0	29	Scheduled Follow-up Submission	Four Tier	82463 NEUROENDOCRINE CARCINOMA NOS			Tissue Biopsy	YES	32	8	12	12	G1	0	0	NA	No				YES			NA	Distal Pancreatectomy	7th	NO	YES	3A	1	2014	2010	NA	NA
TCGA-3A-A9IR-01A	MX	N0	Adenomas and Adenocarcinomas	T2	Occasional Drinker		YES	NO	NO	64	No	YES	female		392.50.0	29	Scheduled Follow-up Submission	Four Tier	NEUROENDOCRINE CARCINOMA NOS			Tissue Biopsy	NO	13	4	12	12	G1	0	0	NA	No		TUMOR FREE	NO	YES	Complete Remission/Response	NO	2004	Distal Pancreatectomy	7th	NO	YES	3A	4	2014	2010	1989	NA
TCGA-3A-A9IO-01A	MX	NX	Adenomas and Adenocarcinomas	TX	Occasional Drinker		NO	NO	YES	55	No	YES	male		392.50.0	29	Scheduled Follow-up Submission	Four Tier	NEUROENDOCRINE CARCINOMA NOS			Tissue Biopsy	NO	NA	3	12	12	G1	NA	NA	NA	No		TUMOR FREE	NO	NO		NO	NA	Distal Pancreatectomy	6th	NO	YES	3A	1	2014	2009	NA	NA
TCGA-3A-A9IN-01A	MX	NX	Adenomas and Adenocarcinomas	T2	Daily Drinker	Complete Remission/Response	YES	NO	NO	62	No	YES	female		410.47.0	31	Scheduled Follow-up Submission	Four Tier	NEUROENDOCRINE CARCINOMA NOS	Subtotal pancreatectomy		Tissue Biopsy	NO	NA	5	12	12	G2	NA	NA	NA	No		TUMOR FREE	YES	NO	Complete Remission/Response	YES	NA	Other Method (please specify)	6th	NO	YES	3A	1	2014	2008	NA	NA
TCGA-3A-A9IL-01A	MX		Adenomas and Adenocarcinomas	T1			NO	NO	NO	39	No	YES	female		392.50.0	29	Scheduled Follow-up Submission	Four Tier	NEUROENDOCRINE CARCINOMA NOS			Tissue Biopsy	NO	9	1.3	12	12	G1	5	0	NA	Yes, History of Prior Malignancy		TUMOR FREE	NO	YES		NO	NA	Whipple	6th	NO	YES	3A	1	2014	2007	NA	NA
TCGA-3A-A9IJ-01A	MX	N0	Adenomas and Adenocarcinomas	T2		Complete Remission/Response	NO	NO	NO	65	No	YES	male		410.47.0	31	Scheduled Follow-up Submission	Four Tier	NEUROENDOCRINE CARCINOMA NOS			Tissue Biopsy	NO	16	3.5	12	12	G1	0	0	25	Yes, History of Prior Malignancy		TUMOR FREE	NO	YES	Complete Remission/Response	NO	1984	Whipple	6th	NO	YES	3A	3	2014	2009	1954	NA
TCGA-3A-A9IH-01A	MX	N0	Ductal and Lobular Neoplasms	T1	Daily Drinker	Stable Disease	NO	YES	NO	66	No	YES	female		410.47.0	31	Scheduled Follow-up Submission			Subtotal pancreatectomy and splenectomy and cholecystectomy		Tissue Biopsy	NO	8	2	12	12	G2	0	0	NA	No		WITH TUMOR	YES	YES		NO	2002	Other Method (please specify)	7th	NO	YES	3A	4	2014	2012	NA	NA
TCGA-3A-A9IC-01A	MX	N1	Ductal and Lobular Neoplasms	T3	Weekly Drinker		YES	YES	NO	61	No	YES	female		392.50.0	NA						Tissue Biopsy		21	4	12	NA	G2	4	0	NA	No				YES			NA	Whipple	7th	NO	YES	3A	1	NA	2011	NA	NA
TCGA-3A-A9IB-01A	MX	N1	Ductal and Lobular Neoplasms	T3			NO	YES	YES	69	No	YES	female		410.47.0	NA						Tissue Biopsy		21	4	12	NA	G3	5	0	5	No				YES			1982	Whipple	7th	NO	YES	3A	3	NA	2011	1962	NA
TCGA-3A-A9I9-01A	MX	N0	Ductal and Lobular Neoplasms	T3	Weekly Drinker		YES	NO	NO	67	No	YES	male		392.50.0	NA						Tissue Biopsy		23	2.5	12	NA	G2	0	0	75	No				YES			2007	Whipple	7th	NO	YES	3A	4	NA	2011	NA	NA
TCGA-3A-A9I7-01A	MX	N1	Ductal and Lobular Neoplasms	T3			NO	NO	NO	45	No	YES	male		392.50.0	29	Scheduled Follow-up Submission					Tissue Biopsy	NO	28	NA	12	12	G2	2	0	NA	No		WITH TUMOR		YES			NA	Whipple	7th	NO	YES	3A	NA	2014	2010	NA	NA
TCGA-3A-A9I5-01A	MX	N0	Ductal and Lobular Neoplasms			Complete Remission/Response	YES	NO	NO	57	No	YES	male	Duct	392.50.0	31	Scheduled Follow-up Submission	Four Tier				Tissue Biopsy	NO	13	3	12	12	G1	0	0	NA	Yes, History of Prior Malignancy		TUMOR FREE	YES	YES	Complete Remission/Response	YES	NA	Whipple	6th	NO	YES	3A	NA	2014	2009	NA	NA
TCGA-2L-AAQM-11A	MX	N1	Adenomas and Adenocarcinomas	T3	Daily Drinker	Complete Remission/Response		NO		52	No	YES	male	Panreatic body and tail, spread to stomach	410.47.0	29	Scheduled Follow-up Submission	Three Tier	Neuroendocrine			Tumor resection	NO	57	14	12	7	G1	16	NA	NA	No		TUMOR FREE	NO	YES	Stable Disease	NO	NA	Distal Pancreatectomy	7th	NO	YES	2L	1	2014	2010	NA	NA
TCGA-2L-AAQM-01A	MX	N1	Adenomas and Adenocarcinomas	T3	Daily Drinker	Complete Remission/Response		NO		52	No	YES	male	Panreatic body and tail, spread to stomach	410.47.0	29	Scheduled Follow-up Submission	Three Tier	Neuroendocrine			Tumor resection	NO	57	14	12	7	G1	16	NA	NA	No		TUMOR FREE	NO	YES	Stable Disease	NO	NA	Distal Pancreatectomy	7th	NO	YES	2L	1	2014	2010	NA	NA
TCGA-2L-AAQL-11A	MX	N1	Ductal and Lobular Neoplasms	T3	Daily Drinker	Progressive Disease	NO	NO	NO	82	No	YES	male		392.50.0	29	Scheduled Follow-up Submission	Three Tier				Tumor resection	NO	43	4	12	7	G3	3	NA	NA	No	Pancreatic Cancer	WITH TUMOR	NO	YES	Progressive Disease	NO	NA	Whipple	7th	NO	YES	2L	1	2014	2011	NA	NA
TCGA-2L-AAQL-01A	MX	N1	Ductal and Lobular Neoplasms	T3	Daily Drinker	Progressive Disease	NO	NO	NO	82	No	YES	male		392.50.0	29	Scheduled Follow-up Submission	Three Tier				Tumor resection	NO	43	4	12	7	G3	3	NA	NA	No	Pancreatic Cancer	WITH TUMOR	NO	YES	Progressive Disease	NO	NA	Whipple	7th	NO	YES	2L	1	2014	2011	NA	NA
TCGA-2L-AAQJ-11A	MX	N0	Ductal and Lobular Neoplasms	T4	None	Progressive Disease		NO	NO	49	No	YES	female		410.47.0	29	Scheduled Follow-up Submission	Three Tier				Tumor resection	NO	21	3	12	7	G2	0	NA	NA	No	Pancreatic Cancer	WITH TUMOR	YES	YES	Progressive Disease	NO	NA	Whipple	7th	NO	YES	2L	1	2014	2010	NA	NA
TCGA-2L-AAQJ-01A	MX	N0	Ductal and Lobular Neoplasms	T4	None	Progressive Disease		NO	NO	49	No	YES	female		410.47.0	29	Scheduled Follow-up Submission	Three Tier				Tumor resection	NO	21	3	12	7	G2	0	NA	NA	No	Pancreatic Cancer	WITH TUMOR	YES	YES	Progressive Disease	NO	NA	Whipple	7th	NO	YES	2L	1	2014	2010	NA	NA
TCGA-2L-AAQI-11A	MX	N1	Ductal and Lobular Neoplasms	T3	None	Progressive Disease	NO	YES		66	No	YES	male		410.47.0	29	Scheduled Follow-up Submission	Three Tier				Tumor resection	NO	19	4	12	7	G3	6	NA	NA	No	Pancreatic Cancer	WITH TUMOR	YES	YES	Progressive Disease	NO	NA	Whipple	7th	NO	YES	2L	1	2014	2011	NA	NA
TCGA-2L-AAQI-01A	MX	N1	Ductal and Lobular Neoplasms	T3	None	Progressive Disease	NO	YES		66	No	YES	male		410.47.0	29	Scheduled Follow-up Submission	Three Tier				Tumor resection	NO	19	4	12	7	G3	6	NA	NA	No	Pancreatic Cancer	WITH TUMOR	YES	YES	Progressive Disease	NO	NA	Whipple	7th	NO	YES	2L	1	2014	2011	NA	NA
TCGA-2L-AAQE-11A	M0	N1	Ductal and Lobular Neoplasms	T3	Daily Drinker	Progressive Disease		YES	YES	56	No	YES	male		410.47.0	29	Scheduled Follow-up Submission	Three Tier				Tumor resection	NO	22	4.5	12	7	G2	1	NA	30	No	Pancreatic Cancer	WITH TUMOR	YES	YES	Progressive Disease	NO	NA	Whipple	7th	NO	YES	2L	2	2014	2011	NA	NA
TCGA-2L-AAQE-01A	M0	N1	Ductal and Lobular Neoplasms	T3	Daily Drinker	Progressive Disease		YES	YES	56	No	YES	male		410.47.0	29	Scheduled Follow-up Submission	Three Tier				Tumor resection	NO	22	4.5	12	7	G2	1	NA	30	No	Pancreatic Cancer	WITH TUMOR	YES	YES	Progressive Disease	NO	NA	Whipple	7th	NO	YES	2L	2	2014	2011	NA	NA
TCGA-2L-AAQA-11A	MX	N1	Ductal and Lobular Neoplasms	T3	None	Progressive Disease		NO	NO	76	No	YES	male		392.50.0	11	Scheduled Follow-up Submission	Three Tier				Tumor resection	NO	21	12	12	6	G2	6	NA	30	No	Pancreatic Cancer	WITH TUMOR	YES	YES	Progressive Disease	NO	NA	Whipple	7th	NO	YES	2L	2	2014	2010	NA	NA
TCGA-2L-AAQA-01A	MX	N1	Ductal and Lobular Neoplasms	T3	None	Progressive Disease		NO	NO	76	No	YES	male		392.50.0	11	Scheduled Follow-up Submission	Three Tier				Tumor resection	NO	21	12	12	6	G2	6	NA	30	No	Pancreatic Cancer	WITH TUMOR	YES	YES	Progressive Disease	NO	NA	Whipple	7th	NO	YES	2L	2	2014	2010	NA	NA
TCGA-2J-AABV-01A	M0	N1	Ductal and Lobular Neoplasms	T3				NO	NO	74	No	YES	male		424.46.0	16	Scheduled Follow-up Submission	Four Tier				Tumor resection	NO	28	4.1	12	7	G4	13	0	30	No	Pancreatic Cancer	WITH TUMOR	YES	YES	Progressive Disease	NO	NA	Whipple	7th	NO	YES	2J	5	2014	2012	NA	NA
TCGA-2J-AABU-01A	M0	N1	Ductal and Lobular Neoplasms	T3	Daily Drinker		NO	NO	NO	56	No	YES	male		424.46.0	NA		Four Tier				Tumor resection		28	3.3	12	NA	G3	2	0	NA	No				YES			NA	Whipple	7th	NO	YES	2J	1	NA	2012	NA	NA
TCGA-2J-AABT-01A	M0	N1	Ductal and Lobular Neoplasms	T3	Social Drinker		NO	YES	YES	72	No	YES	female		424.46.0	16	Scheduled Follow-up Submission	Four Tier				Tumor resection	NO	21	4.5	12	7	G2	1	0	NA	Yes, History of Prior Malignancy			YES	YES			NA	Whipple	7th	NO	YES	2J	1	2014	2012	NA	NA
TCGA-2J-AABR-01A	M0	N0	Ductal and Lobular Neoplasms	T3				NO	NO	60	No	YES	female	Head & body of pancreas	424.46.0	16	Scheduled Follow-up Submission	Four Tier				Tumor resection	NO	14	3.2	12	7	G3	0	0	NA	Yes, History of Prior Malignancy		WITH TUMOR	YES	YES	Progressive Disease	NO	NA	Whipple	7th	NO	YES	2J	NA	2014	2013	NA	NA
TCGA-2J-AABP-01A	M0	N1	Epithelial Neoplasms, NOS	T3	Weekly Drinker		YES	NO	NO	58	No	YES	female		424.46.0	16	Scheduled Follow-up Submission	Four Tier				Tumor resection	NO	22	7.2	12	7	G4	1	0	NA	No		TUMOR FREE	YES	YES	Complete Remission/Response	NO	NA	Distal Pancreatectomy	7th	NO	YES	2J	1	2014	2013	NA	NA
TCGA-2J-AABO-01A	M0	N1	Ductal and Lobular Neoplasms	T3			YES	NO	NO	43	No	YES	male		424.46.0	16	Scheduled Follow-up Submission	Four Tier				Tumor resection	NO	16	4.6	12	7	G2	8	0	7.5	No		WITH TUMOR	YES	YES	Progressive Disease	YES	2003	Whipple	7th	NO	YES	2J	4	2014	2013	1993	NA
TCGA-2J-AABK-01A	M0	N1	Ductal and Lobular Neoplasms	T3				NO	NO	71	No	YES	male	Uncinate process	424.46.0	16	Scheduled Follow-up Submission	Four Tier				Tumor resection	NO	19	2.8	12	7	G2	2	0	NA	No		TUMOR FREE	YES	YES	Complete Remission/Response	YES	NA	Whipple	7th	NO	YES	2J	NA	2014	2012	NA	NA
TCGA-2J-AABI-01A	M0	N0	Adenomas and Adenocarcinomas	T3	Social Drinker		NO	YES	NO	55	No	YES	female		424.46.0	16	Scheduled Follow-up Submission	Four Tier	Poorly differentiated adenocarcinoma			Tumor resection	NO	19	3.5	12	7	G3	0	0	42	No		WITH TUMOR	YES	YES	Progressive Disease	YES	2004	Whipple	7th	NO	YES	2J	4	2014	2011	1973	NA
TCGA-2J-AABH-01A	M0	N0	Adenomas and Adenocarcinomas	T3		Complete Remission/Response	YES	NO	NO	61	No	YES	male		424.46.0	16	Scheduled Follow-up Submission	Four Tier	Invasive adenocarcinoma			Tumor resection	NO	8	2.2	12	7	G3	0	0	NA	No		TUMOR FREE	YES	YES	Complete Remission/Response	NO	NA	Distal Pancreatectomy	7th	NO	YES	2J	1	2014	2011	NA	NA
TCGA-2J-AABF-01A	M0	N1	Ductal and Lobular Neoplasms	T3	Weekly Drinker		YES	NO	NO	73	No	YES	male		424.46.0	16	Scheduled Follow-up Submission	Four Tier				Tumor resection	NO	18	3.2	12	7	G3	4	0	7.5	No	Pancreatic Cancer	WITH TUMOR	YES	YES	Progressive Disease	YES	1965	Whipple	7th	NO	YES	2J	3	2014	2012	1960	NA
TCGA-2J-AABE-01A	M0	N0	Ductal and Lobular Neoplasms	T3	Weekly Drinker		NO	NO	YES	73	No	YES	male		424.46.0	16	Scheduled Follow-up Submission	Four Tier				Tumor resection	NO	24	5.8	12	7	G2	0	0	2.2	No		TUMOR FREE	YES	YES	Complete Remission/Response	YES	1970	Distal Pancreatectomy	7th	NO	YES	2J	3	2014	2012	1960	NA
TCGA-2J-AABA-01A	M0	N1	Ductal and Lobular Neoplasms	T3				YES	NO	55	No	YES	male		424.46.0	16	Scheduled Follow-up Submission	Four Tier				Tumor resection	NO	22	4.3	12	7	G2	2	0	51	No	Pancreatic Cancer	WITH TUMOR	YES	YES	Progressive Disease	NO	NA	Whipple	7th	NO	YES	2J	5	2014	2012	NA	NA
TCGA-2J-AAB9-01A	M0	N1	Ductal and Lobular Neoplasms	T3	Weekly Drinker		YES	NO	NO	70	No	YES	female		424.46.0	NA		Four Tier				Tumor resection		37	4	12	NA	G1	6	0	NA	No				YES			NA	Whipple	7th	NO	YES	2J	1	NA	2012	NA	178
TCGA-2J-AAB8-01A	M0	N1	Ductal and Lobular Neoplasms	T3				NO	NO	71	No	YES	male		424.46.0	16	Scheduled Follow-up Submission	Four Tier				Tumor resection	NO	27	3.5	12	7	G3	3	0	NA	No			YES	YES			NA	Whipple	7th	NO	YES	2J	NA	2014	2012	NA	NA
TCGA-2J-AAB6-01A	M0	N0	Ductal and Lobular Neoplasms	T3				NO	NO	75	No	YES	male		424.46.0	NA		Four Tier				Tumor resection		18	5	12	NA	G2	0	0	NA	No				YES			NA	Distal Pancreatectomy	7th	NO	YES	2J	NA	NA	2012	NA	NA
TCGA-2J-AAB4-01A	M0	N1	Adenomas and Adenocarcinomas	T2				YES	NO	48	No	YES	male	Body & Tail of Pancreas	424.46.0	16	Scheduled Follow-up Submission	Four Tier	invasive, well-differentiated			Tumor resection	NO	34	6.8	12	7	G2	0	0	NA	No		TUMOR FREE	YES	YES	Complete Remission/Response	NO	NA	Distal Pancreatectomy	7th	NO	YES	2J	5	2014	2012	NA	NA
TCGA-2J-AAB1-01A	M0	N1	Cystic, Mucinous and Serous Neoplasms	T3	Weekly Drinker		NO	NO	NO	65	No	YES	male		424.46.0	NA		Four Tier	invasive adenocarcinoma			Tumor resection		22	4.5	12	NA	G3	7	0	25	No				YES			1988	Whipple	7th	NO	YES	2J	3	NA	2012	1962	NA
[truncated: 32 more columns]
